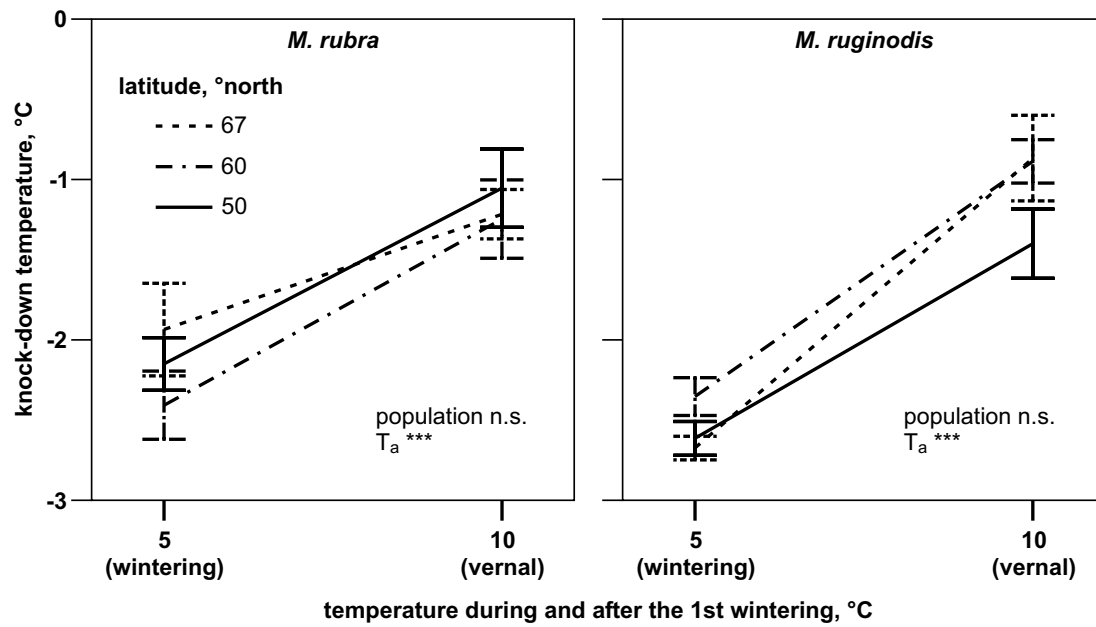

**Fig. S1. Change of chill coma temperature in *Myrmica* over a week of artificial spring.** Averages of colony means  $\pm$  s.e.m. ( $n=5$  colonies). Populations are coded by latitude. Significance levels: \*\*\* $P<.001$ ; n.s., not significant.

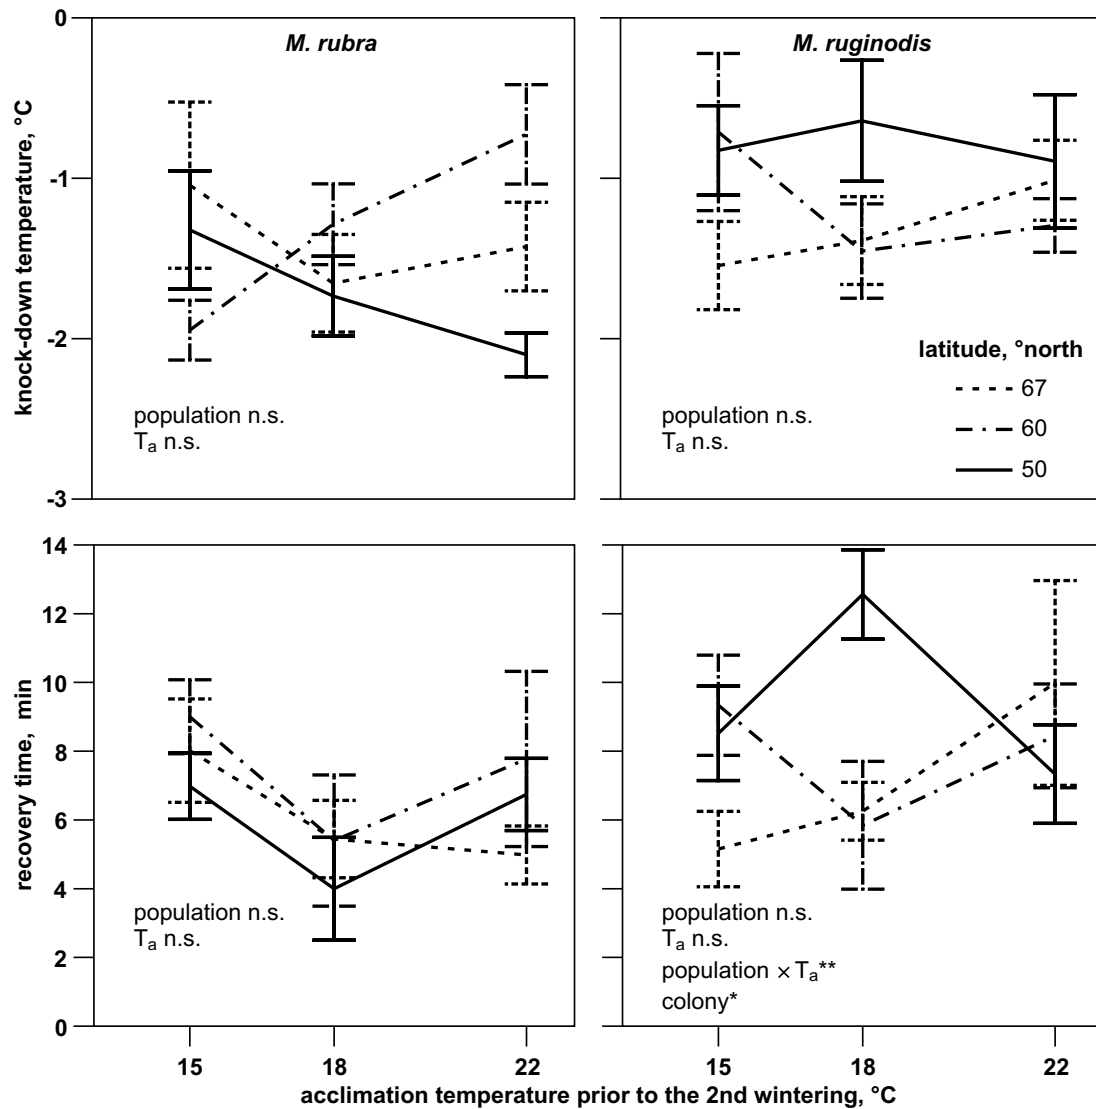

**Fig. S2. Chill coma temperature and recovery time of *Myrmica* in the end of the 2nd artificial winter (at 5°C).** Averages of fraction means  $\pm$  s.e.m. ( $n=5$  colony fractions). Populations are coded by latitude. Note that here ants were left to recover in naturally warming containers transferred from  $-3^{\circ}\text{C}$  to  $20^{\circ}\text{C}$ , instead of immediate transfer of the insects from a container at  $-3^{\circ}\text{C}$  to a container at  $20^{\circ}\text{C}$ , which would result in their quick and nearly simultaneous recovery, giving very little variation for analysis (for the dynamics of the warming, see supplementary material Fig. S3). Photography of recovery was performed manually over 20-seconds intervals, also to increase data variation. Abbreviations: T<sub>a</sub>, temperature of acclimation. Significance levels: \* $P<.05$ , \*\* $P<.01$ ; n.s.: not significant.

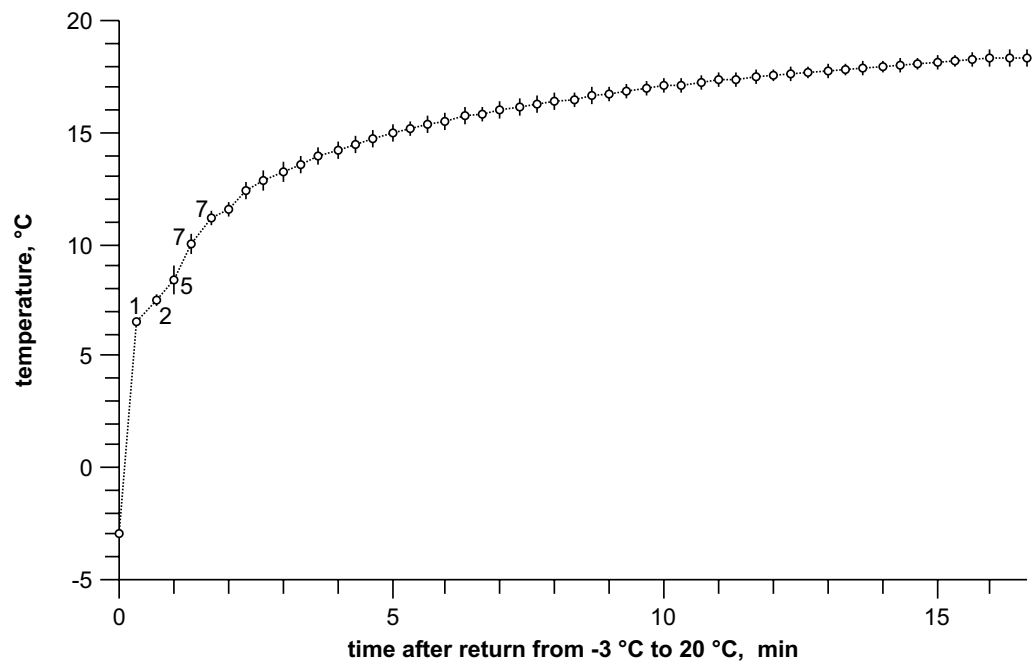

**Fig. S3. The dynamics of container warming during the recovery of ants in the end of the 2nd artificial winter.** Average container temperatures  $\pm$  s.e.m. ( $n=8$  observations, unless indicated otherwise by the numbers near graph points).

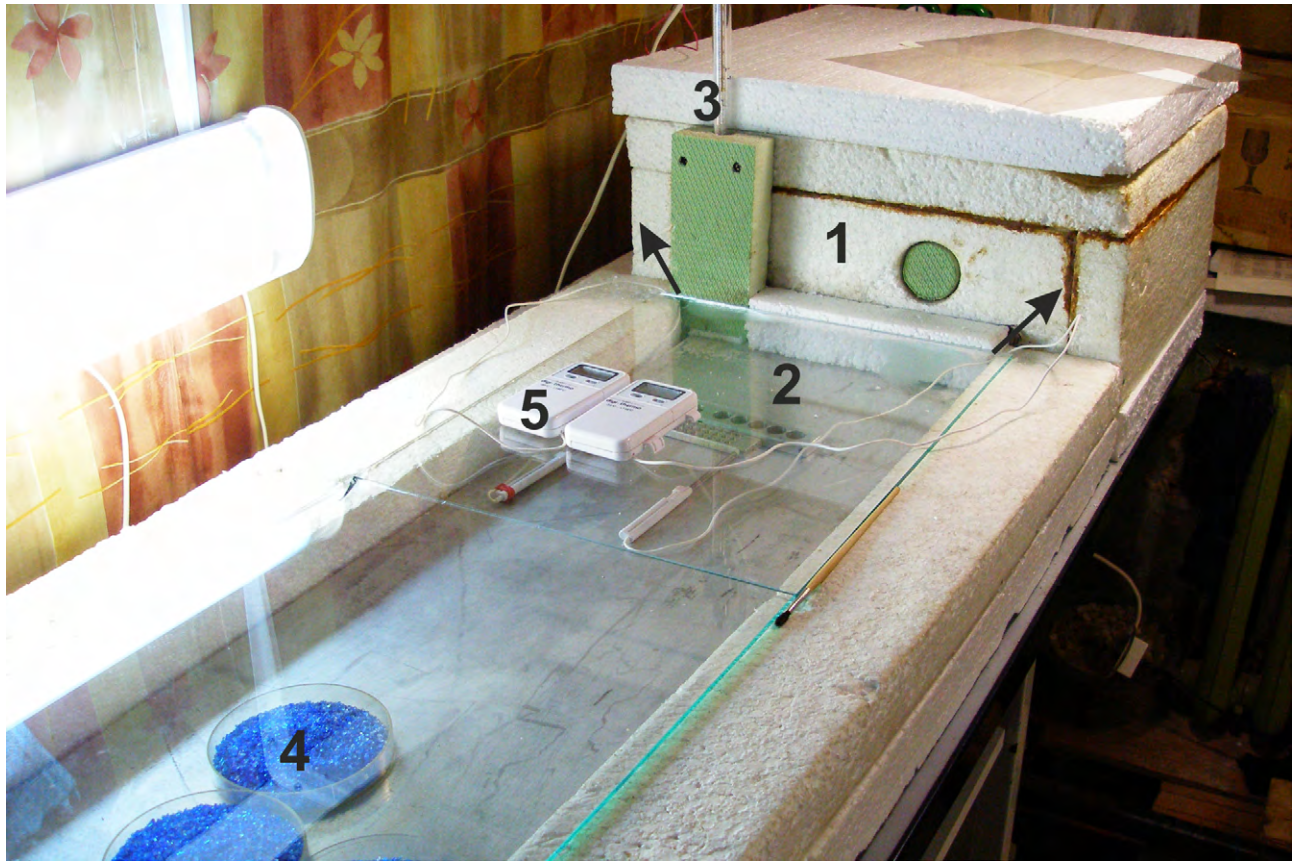

**Fig. S4. The thermogradient device.** 1: A freezer from a household refrigerator, filled with stones to increase thermal inertia and insulated by 50-mm styrofoam; 2: An aluminium plate, insulated by 50-mm styrofoam and covered by 4-mm glass; 3: A contact thermometer, inserted in the plate and connected to an electric relay (not shown) set to switch the freezer off if the colder end of the plate overcooled below a required temperature; 4: Silica gel, placed under the glass to remove excess moisture; 5: Digital thermometers with thermoprobes. Careful pulling (shown by arrows) of the thermoprobe wires allowed to move the well containers and create the required cooling rate ( $0.5^{\circ}\text{C}$  per three minutes, or  $0.17^{\circ}\text{C min}^{-1}$ ).

Table S1. Latitudinal trends tested by one-df *a priori* polynomial contrasts ( $\pm$  standard error), with *p*-values boldfaced for contrasts significantly greater ( $p < .025$ ) than expected zero value.

| Trait      | Dataset     | Species             | Linear contrast, <i>L</i> | <i>p</i>    | Quadratic contrast, <i>Q</i> | <i>p</i>    | Corresponding GLM |
|------------|-------------|---------------------|---------------------------|-------------|------------------------------|-------------|-------------------|
| Knock-down | Acclimation | <i>M. rubra</i>     | −.031±.083                | .705        | .119±.077                    | .123        | Table S3          |
|            |             | <i>M. ruginodis</i> | −.116±.094                | .219        | .004±.088                    | .965        | Table S3          |
|            | Hardening   | <i>M. rubra</i>     | −.005±.003                | .152        | .006±.003                    | .053        | Table S4          |
|            |             | <i>M. ruginodis</i> | −.093±.096                | .333        | .151±.089                    | .091        | Table S4          |
| Recovery   | Acclimation | <i>M. rubra</i>     | −.973±.192                | <b>.000</b> | −.830±.178                   | <b>.000</b> | Table S5          |
|            |             | <i>M. ruginodis</i> | −.007±.005                | .173        | −.030±.005                   | <b>.000</b> | Table S5          |
|            | Hardening   | <i>M. rubra</i>     | −.926±.304                | <b>.003</b> | −.903±.227                   | <b>.000</b> | Table S6          |
|            |             | <i>M. ruginodis</i> | −.475±1.620               | .770        | 2.595±1.431                  | .073        | Table S6          |

Table S2. Temperature-dependence trends tested by one-df *a priori* polynomial contrasts ( $\pm$  standard error), with *p*-values boldfaced for those significantly greater ( $p < .025$ ) than expected zero value. Values in italic: signs inversed due to reciprocal data transformation.

| Trait             | Dataset     | Species             | Linear contrast, $L$ | $p$         | Quadratic contrast, $Q$ | $p$         | Corresponding GLM |
|-------------------|-------------|---------------------|----------------------|-------------|-------------------------|-------------|-------------------|
| t° of acclimation |             |                     |                      |             |                         |             |                   |
| Knock-down        | Acclimation | <i>M. rubra</i>     | 1.447±.077           | <b>.000</b> | -.172±.077              | .026        | Table S3          |
|                   |             | <i>M. ruginodis</i> | 1.305±.074           | <b>.000</b> | -.155±.074              | .038        | Table S3          |
|                   | Hardening   | <i>M. rubra</i>     | .038±.003            | <b>.000</b> | -.014±.003              | <b>.000</b> | Table S4          |
|                   |             | <i>M. ruginodis</i> | 1.009±.086           | <b>.000</b> | -.098±.082              | .235        | Table S4          |
| Recovery          | Acclimation | <i>M. rubra</i>     | 2.029±.178           | <b>.000</b> | -.039±.176              | .827        | Table S5          |
|                   |             | <i>M. ruginodis</i> | -.057±.004           | <b>.000</b> | .018±.004               | <b>.000</b> | Table S5          |
|                   | Hardening   | <i>M. rubra</i>     | 3.455±.229           | <b>.000</b> | -1.051±.225             | <b>.000</b> | Table S6          |
|                   |             | <i>M. ruginodis</i> | 21.275±1.370         | <b>.000</b> | -7.725±1.280            | <b>.000</b> | Table S6          |
| t° of hardening   |             |                     |                      |             |                         |             |                   |
| Knock-down        | Hardening   | <i>M. rubra</i>     | .004±.003            | .172        | .014±.003               | <b>.000</b> | Table S4          |
|                   |             | <i>M. ruginodis</i> | .093±.081            | .255        | .506±.081               | <b>.000</b> | Table S4          |
| Recovery          | Hardening   | <i>M. rubra</i>     | .423±.226            | .064        | -.852±.229              | <b>.000</b> | Table S6          |
|                   |             | <i>M. ruginodis</i> | 2.615±1.275          | .043        | -3.101±1.271            | <b>.016</b> | Table S6          |

Table S3. Final GLMs for knock-down during the acclimation period. Abbreviations: pop, population; at, acclimation temperature; ad, acclimation duration. Significant effects (with  $p < .025$ ) are boldfaced. Footnotes show automatic corrections for error mean squares (denominators of  $F$ -ratios) in higher-order factors. Factors shown with only one mean square had the residual MS as the denominator.

| <i>M. rubra</i>                                                          |         |                    |          |             | <i>M. ruginodis</i>                                                      |         |                    |          |             |
|--------------------------------------------------------------------------|---------|--------------------|----------|-------------|--------------------------------------------------------------------------|---------|--------------------|----------|-------------|
| Source                                                                   | df      | MS                 | <i>F</i> | <i>p</i>    | Source                                                                   | df      | MS                 | <i>F</i> | <i>p</i>    |
| Intercept                                                                | 1       | .0014              | .002     | .967        | Intercept                                                                | 1       | .046               | .066     | .797        |
|                                                                          | 383.488 | .794 <sup>a</sup>  |          |             |                                                                          | 367.673 | .691 <sup>c</sup>  |          |             |
| pop                                                                      | 2       | 1.004              | .459     | .642        | pop                                                                      | 2       | .534               | .299     | .746        |
|                                                                          | 12.590  | 2.184 <sup>b</sup> |          |             |                                                                          | 15.414  | 1.787 <sup>d</sup> |          |             |
| <b>at</b>                                                                | 2       | 141.384            | 178.767  | <b>.000</b> | <b>at</b>                                                                | 2       | 107.460            | 156.016  | <b>.000</b> |
| pop × at                                                                 | 4       | .820               | 1.037    | .388        | pop × at                                                                 | 4       | 1.369              | 1.987    | .096        |
| <b>colony(pop)</b>                                                       | 12      | 2.282              | 2.886    | <b>.000</b> | <b>colony(pop)</b>                                                       | 12      | 2.271              | 3.297    | <b>.000</b> |
| size                                                                     | 1       | .000               | .001     | .981        | size                                                                     | 1       | .059               | .086     | .770        |
| <b>ad</b>                                                                | 1       | 45.713             | 57.801   | <b>.000</b> | <b>ad</b>                                                                | 1       | 48.806             | 70.859   | <b>.000</b> |
| Residue                                                                  | 379     | .791               |          |             | Residue                                                                  | 364     | .689               |          |             |
| <sup>a</sup> .002 MS <sub>colony(pop)</sub> + .998 MS <sub>Residue</sub> |         |                    |          |             | <sup>c</sup> .002 MS <sub>colony(pop)</sub> + .998 MS <sub>Residue</sub> |         |                    |          |             |
| <sup>b</sup> .934 MS <sub>colony(pop)</sub> + .066 MS <sub>Residue</sub> |         |                    |          |             | <sup>b</sup> .694 MS <sub>colony(pop)</sub> + .306 MS <sub>Residue</sub> |         |                    |          |             |

Table S4. Final GLMs for knock-down in the hardening trials. Abbreviations: pop, population; at, acclimation temperature; ht, hardening temperature. Significant effects (with  $p < .025$ ) are boldfaced. Footnotes show automatic corrections for error mean squares (denominators of  $F$ -ratios) in higher-order factors. Factors shown with only one mean square had the residual MS as the denominator. To standardize variance, data for *M. rubra* were transformed as  $\log_{10}(x+11.5)$  and non-significant interaction terms were removed.

| <i>M. rubra</i>                                                          |         |                   |          |             | <i>M. ruginodis</i>                                                      |         |                    |        |             |
|--------------------------------------------------------------------------|---------|-------------------|----------|-------------|--------------------------------------------------------------------------|---------|--------------------|--------|-------------|
| Source                                                                   | df      | MS                | $F$      | $p$         | Source                                                                   | df      | MS                 | $F$    | $p$         |
| <b>Intercept</b>                                                         | 1       | 1.348             | 1060.547 | <b>.000</b> | Intercept                                                                | 1       | .156               | .184   | .668        |
|                                                                          | 381.959 | .001 <sup>a</sup> |          |             |                                                                          | 350.506 | .846 <sup>c</sup>  |        |             |
| pop                                                                      | 2       | .004              | 1.242    | .321        | pop                                                                      | 2       | 1.563              | 1.217  | .322        |
|                                                                          | 13.086  | .003 <sup>b</sup> |          |             |                                                                          | 16.090  | 1.284 <sup>d</sup> |        |             |
| <b>at</b>                                                                | 2       | .112              | 88.883   | <b>.000</b> | <b>at</b>                                                                | 2       | 58.920             | 69.824 | <b>.000</b> |
| <b>ht</b>                                                                | 2       | .014              | 10.957   | <b>.000</b> | <b>ht</b>                                                                | 2       | 16.916             | 20.046 | <b>.000</b> |
| pop × at                                                                 | 4       | .003              | 2.181    | .071        | pop × at                                                                 | 4       | 1.026              | 1.216  | .304        |
|                                                                          |         |                   |          |             | pop × ht                                                                 | 4       | .398               | .472   | .756        |
| at × ht                                                                  | 4       | .002              | 1.868    | .115        | at × ht                                                                  | 4       | .420               | .497   | .738        |
|                                                                          |         |                   |          |             | pop × at × ht                                                            | 8       | .702               | .832   | .575        |
| <b>colony(pop)</b>                                                       | 12      | .003              | 2.398    | <b>.005</b> | colony(pop)                                                              | 12      | 1.400              | 1.659  | .074        |
| size                                                                     | 1       | .003              | 2.411    | .121        | size                                                                     | 1       | 1.167              | 1.383  | .240        |
| Residue                                                                  | 377     | .001              |          |             | Residue                                                                  | 347     | .844               |        |             |
| <sup>a</sup> .003 MS <sub>colony(pop)</sub> + .997 MS <sub>Residue</sub> |         |                   |          |             | <sup>c</sup> .003 MS <sub>colony(pop)</sub> + .997 MS <sub>Residue</sub> |         |                    |        |             |
| <sup>b</sup> .904 MS <sub>colony(pop)</sub> + .096 MS <sub>Residue</sub> |         |                   |          |             | <sup>d</sup> .792 MS <sub>colony(pop)</sub> + .208 MS <sub>Residue</sub> |         |                    |        |             |



Table S5. Final GLMs for recovery in the acclimation period. Abbreviations: pop, population; at, acclimation temperature; ad, acclimation duration. Significant effects (with  $p < .025$ ) are boldfaced. Footnotes show automatic corrections for error mean squares (denominators of  $F$ -ratios) in higher-order factors. Factors shown with only one mean square had the residual MS as the denominator. To standardize variance, data for *M. ruginodis* were transformed as  $(x+5)^{-0.5}$  and a non-significant interaction term was removed.

| <i>M. rubra</i>                                                          |         |                    |          |             | <i>M. ruginodis</i>                                                      |         |                   |          |             |
|--------------------------------------------------------------------------|---------|--------------------|----------|-------------|--------------------------------------------------------------------------|---------|-------------------|----------|-------------|
| Source                                                                   | df      | MS                 | <i>F</i> | <i>p</i>    | Source                                                                   | df      | MS                | <i>F</i> | <i>p</i>    |
| <b>Intercept</b>                                                         | 1       | 34.120             | 12.286   | <b>.001</b> | <b>Intercept</b>                                                         | 1       | .082              | 57.385   | <b>.000</b> |
|                                                                          | 245.692 | 2.777 <sup>a</sup> |          |             |                                                                          | 239.566 | .001 <sup>c</sup> |          |             |
| <b>pop</b>                                                               | 2       | 65.693             | 14.046   | <b>.001</b> | <b>pop</b>                                                               | 2       | .033              | 13.647   | <b>.000</b> |
|                                                                          | 13.084  | 4.677 <sup>b</sup> |          |             |                                                                          | 17.649  | .002 <sup>d</sup> |          |             |
| <b>at</b>                                                                | 2       | 180.747            | 65.182   | <b>.000</b> | <b>at</b>                                                                | 2       | .150              | 104.904  | <b>.000</b> |
| <b>pop × at</b>                                                          | 4       | 9.385              | 3.385    | <b>.010</b> |                                                                          |         |                   |          |             |
| colony(pop)                                                              | 12      | 4.824              | 1.740    | .059        | colony(pop)                                                              | 12      | .003              | 1.965    | .028        |
| size                                                                     | 1       | 6.417              | 2.314    | .130        | size                                                                     | 1       | .006              | 4.401    | .037        |
| <b>ad</b>                                                                | 1       | 467.545            | 168.609  | <b>.000</b> | <b>ad</b>                                                                | 1       | .222              | 154.801  | <b>.000</b> |
| Residue                                                                  | 244     | 2.773              |          |             | Residue                                                                  | 238     | .001              |          |             |
| <sup>a</sup> .002 MS <sub>colony(pop)</sub> + .998 MS <sub>Residue</sub> |         |                    |          |             | <sup>c</sup> .002 MS <sub>colony(pop)</sub> + .998 MS <sub>Residue</sub> |         |                   |          |             |
| <sup>b</sup> .929 MS <sub>colony(pop)</sub> + .071 MS <sub>Residue</sub> |         |                    |          |             | <sup>d</sup> .704 MS <sub>colony(pop)</sub> + .296 MS <sub>Residue</sub> |         |                   |          |             |

Table S6. Final GLMs for recovery in the hardening trials. Abbreviations: pop, population; at, acclimation temperature; ht, hardening temperature. Significant effects (with  $p < .025$ ) are boldfaced. Fraction means were used, transformed in *M. ruginodis* as  $x^{1.7}$ , and insignificant interaction terms were removed, to standardize variance.

| <i>M. rubra</i> |     |         |          |             | <i>M. ruginodis</i> |     |          |          |             |
|-----------------|-----|---------|----------|-------------|---------------------|-----|----------|----------|-------------|
| Source          | df  | MS      | <i>F</i> | <i>p</i>    | Source              | df  | MS       | <i>F</i> | <i>p</i>    |
| Intercept       | 1   | 2.375   | 1.043    | .309        | Intercept           | 1   | 5.664    | .082     | .775        |
| <b>pop</b>      | 2   | 31.531  | 13.847   | <b>.000</b> | pop                 | 2   | 114.625  | 1.659    | .195        |
| <b>at</b>       | 2   | 282.723 | 124.160  | <b>.000</b> | <b>at</b>           | 2   | 9818.171 | 142.072  | <b>.000</b> |
| <b>ht</b>       | 2   | 19.463  | 8.547    | <b>.000</b> | <b>ht</b>           | 2   | 351.171  | 5.082    | <b>.008</b> |
|                 |     |         |          |             | pop × at            | 4   | 85.367   | 1.235    | .300        |
|                 |     |         |          |             | pop × ht            | 4   | 18.338   | .265     | .900        |
|                 |     |         |          |             | <b>at × ht</b>      | 4   | 240.502  | 3.480    | <b>.010</b> |
| <b>size</b>     | 1   | 13.323  | 5.851    | <b>.017</b> | size                | 1   | 160.983  | 2.329    | .130        |
| Residue         | 127 | 2.277   |          |             | Residue             | 109 | 69.107   |          |             |
